# Supplementary material
Source: PubMed Central journal article supplement (PMC2958516)
Supplement: NIHMS238262-supplement-e_table.pdf [file NIHMS238262-supplement-e_table.pdf]

## Supplementary Online Content

Volkow ND, Wang G-J, Kollins SH, et al. Evaluating Dopamine Reward Pathway in ADHD: Clinical Implications. *JAMA*. 2009;302(10):1084-1091.

**eTable.** Brain Regions Where Statistical Parametric Mapping Identified Significant Decreases in Dopamine D2/D3 Receptor and Dopamine Transporter Availability in ADHD Participants Compared With Controls

This supplementary material has been provided by the authors to give readers additional information about their work.

**eTable.** Brain Regions Where Statistical Parametric Mapping Identified Significant Decreases in Dopamine D<sub>2</sub>/D<sub>3</sub> Receptor and Dopamine Transporter Availability in ADHD Participants Compared With Controls<sup>a</sup>

|                                         | <b>Pixels</b> | <b>Left Hemisphere Region</b>                            | <b>Coordinates</b> | <b>t Test</b> | <b>P Value<sup>b</sup></b> |
|-----------------------------------------|---------------|----------------------------------------------------------|--------------------|---------------|----------------------------|
| D <sub>2</sub> /D <sub>3</sub> receptor |               |                                                          |                    |               |                            |
| Cluster 1                               | 769           | Accumbens<br>Ventral caudate<br>Hypothalamus<br>Midbrain | -4, 4, -6          | 3.27          | .001                       |
| Dopamine transporter                    |               |                                                          |                    |               |                            |
| Cluster 1                               | 862           | Accumbens<br>Ventral caudate<br>Hypothalamus<br>Midbrain | -4, 12, -8         | 3.49          | <.001                      |

<sup>a</sup>Coordinates (x, y, z) are with respect to the Talariach Atlas and significance corresponds to  $P < .005$  uncorrected, cluster size is more than 100 pixels. The coordinates x correspond to left to right; y, anterior to posterior; and z, top to bottom.

<sup>b</sup>Two sided, for the activation centers.
